# Supplementary material for: Host Cell Binding Mediated by Leptospira interrogans Adhesins
Source: Int J Mol Sci. 2022 Dec 8;23(24):15550. doi: 10.3390/ijms232415550 (PMC9779477; doi:10.3390/ijms232415550)
Supplement: Supplementary file 1 [file ijms-23-15550-s001.zip › ijms-1979197-supplementary.pdf]

**Figure S1. 12% SDS-PAGE analysis of the recombinant proteins.** The proteins OmpL1, OmpL37, LipL21, LipL41 and LipL46 were expressed in *Escherichia coli* using the pET-SUMO vector. After purification using immobilized metal affinity chromatography, the fusion proteins were cleaved using the enzyme Ulp-1. Proteins were isolated from the SUMO tag and Ulp-1 by a second chromatographic step. Lanes were represented by M: molecular mass marker, 1: OmpL1, 2: OmpL37, 3: LipL21, 4: LipL46 and 5: LipL41.

**Figure S2. The effect on the binding of increasing concentration of recombinant proteins to endothelial cell monolayers.** Ninety-six-well plate were seeded with  $10^5$  cell/well at 37°C under 5% CO<sub>2</sub> for 24 h. Proteins were added in cell media with 1 µM aprotinin for 2 h. Binding was fixed with 2% paraformaldehyde for 30 min at room temperature. Polyclonal antibodies against the recombinant proteins (1:5,000) were added for 1 h. Reaction was detected with anti-mouse IgG-peroxidase (1:5,000). The dose-dependent curves were fitted using the GraphPad Prism software. Bars and points represent the mean absorbance at 492 nm  $\pm$  SD of three replicates. A: EA.hy926 and OmpL1, B: HMEC-1 and OmpL1, C: HMEC-1 and LipL41, D: HULEC5a and OmpL1, E: HULEC5a and LipL46 and F: EA.hy926 and LipL41.

**Figure S3. The effect on the binding of increasing concentration of recombinant proteins to epithelial cell monolayers.** Ninety-six-well plate were seeded with  $10^5$  cell/well at 37°C under 5% CO<sub>2</sub> for 24 h. Proteins were added in cell media with 1 µM aprotinin for 2 h. Binding was fixed with 2% paraformaldehyde for 30 min at room temperature. Polyclonal antibodies against the recombinant proteins (1:5,000) were added for 1 h. Reaction was detected with anti-mouse IgG-peroxidase (1:5,000). The

dose-dependent curves were fitted using the GraphPad Prism software. Bars and points represent the mean absorbance at 492 nm  $\pm$  SD of three replicates. A: HEK293T and OmpL37, B: HEK293T and OmpL1, C: HEK293T and LipL21, D: HEK293T and LipL41, E: HEK293T and LipL46, F: MDBK and OmpL1, G: MDBK and LipL41 and H: MDBK and LipL46.

**Figure S4. The effect on the binding of increasing concentration of recombinant proteins to fibroblast cell monolayers.** Ninety-six-well plate were seeded with  $10^5$  cell/well at 37°C under 5% CO<sub>2</sub> for 24 h. Proteins were added in cell media with 1  $\mu$ M aprotinin for 2 h. Binding was fixed with 2% paraformaldehyde for 30 min at room temperature. Polyclonal anti-bodies against the recombinant proteins (1:5,000) were added for 1 h. Reaction was detected with anti-mouse IgG-peroxidase (1:5,000). The dose-dependent curves were fitted using the GraphPad Prism software. Bars and points represent the mean absorbance at 492 nm  $\pm$  SD of three replicates. A: E. Derm and OmpL1, B: E. Derm and LipL41, C: BHK-21 and OmpL1, and D: BHK-21 and LipL41.

**Figure S1**

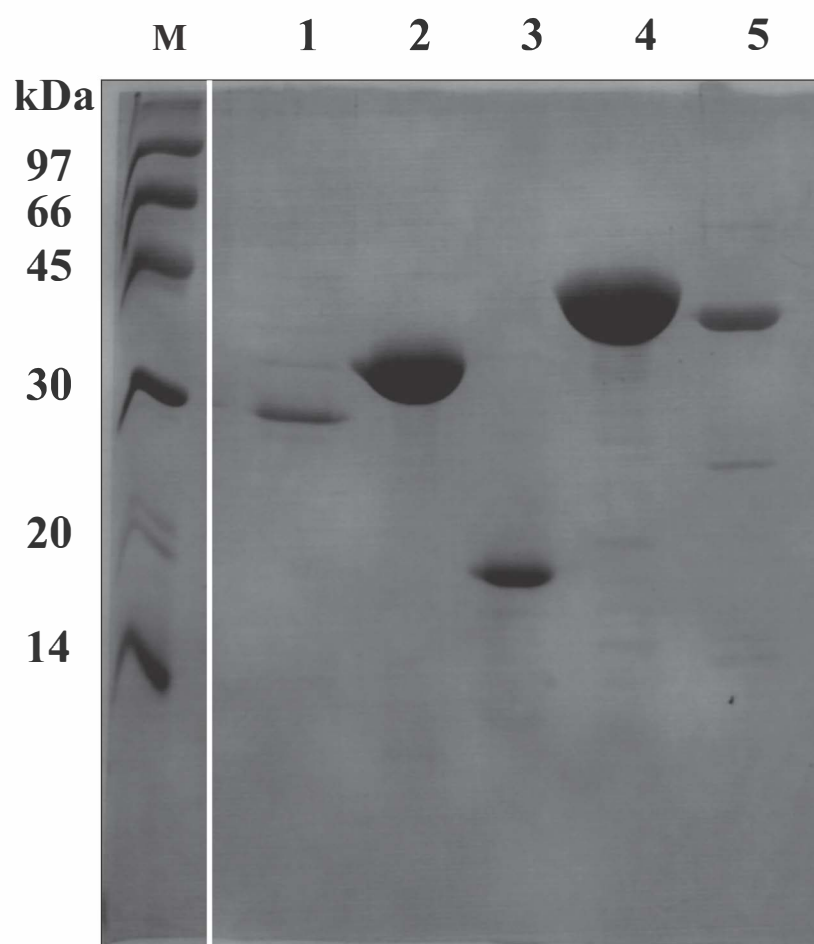

**Figure S2**

**A) EA.hy926**

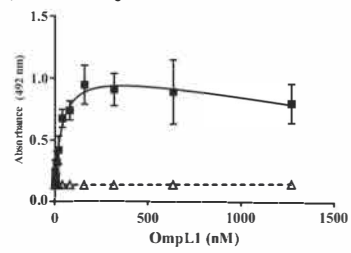

**B) HMEC-1**

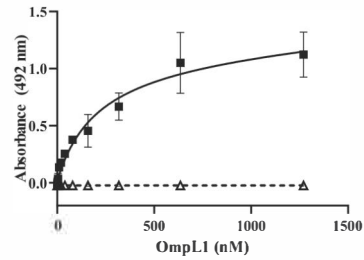

**C) HMEC-1**

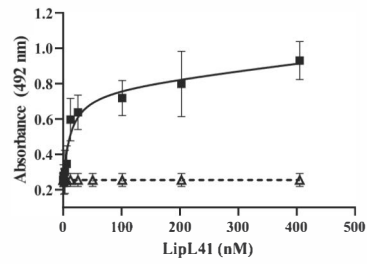

**D) HULEC5a**

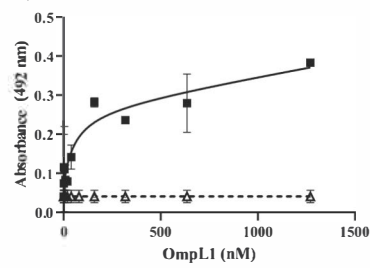

**E) HULEC5a**

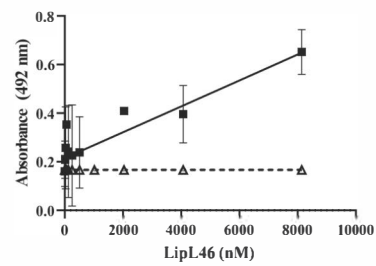

**F) EA.hy926**

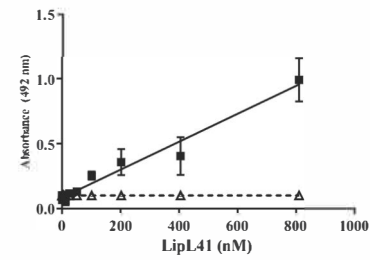

-△- Cell + Antibodies  
 -■- Cell + Protein + Antibodies

**Figure S3**

**A) HEK293T**

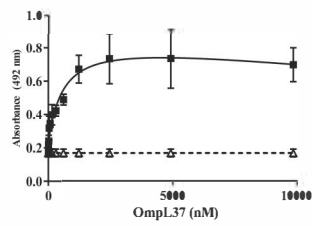

**B) HEK293T**

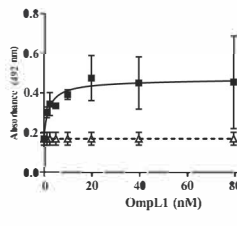

**C) HEK293T**

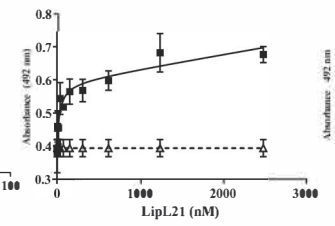

**D) HEK293T**

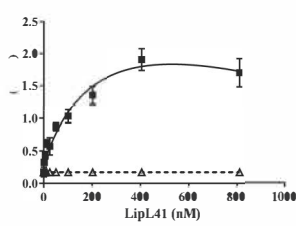

**E) HEK293T**

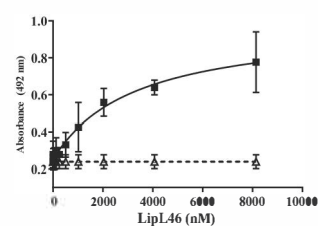

**F) MDBK**

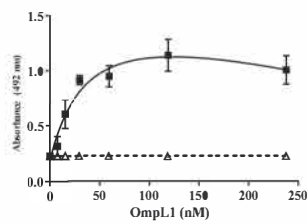

**G) MDBK**

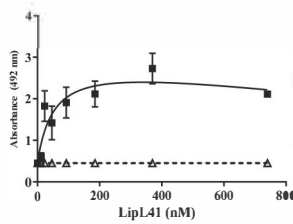

**H) MDBK**

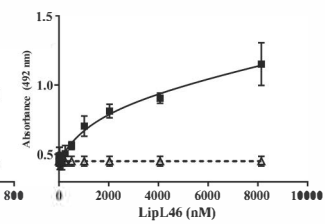

▲ Cell + Antibodies  
 ■ Cell + Protein + Antibodies

**Figure S4**

**A) E. Derm**

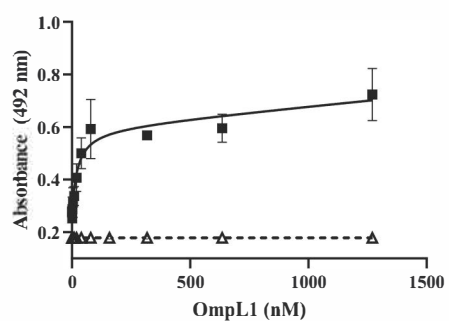

**B) E. Derm**

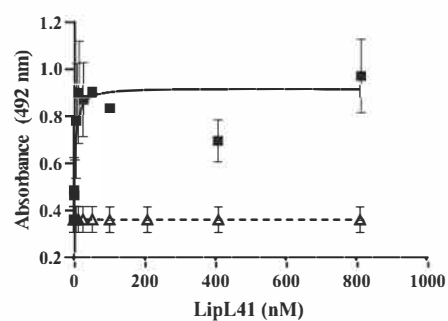

**C) BHK-21**

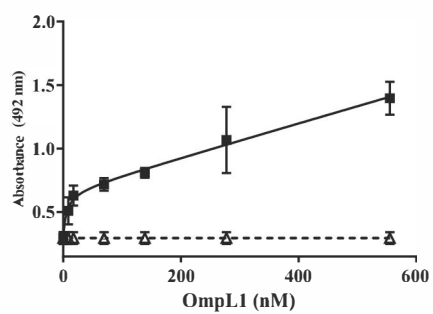

**D) BHK-21**

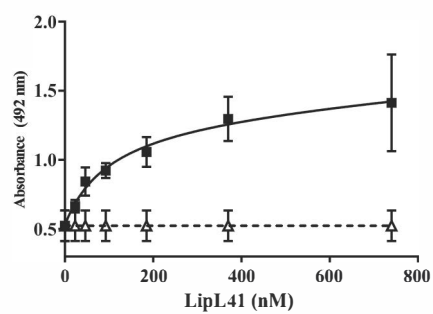

—▲— Cell + Antibodies  
—■— Cell + Protein + Antibodies

Table S1. Primers used to amplify the genes of interest

| Gene   | Sequences                                                                                                                                    |
|--------|----------------------------------------------------------------------------------------------------------------------------------------------|
| LipL21 | <i>Forward 5' CGC <b>GAATTC</b> TCCAGTACTGACACAGGA 3' (EcoRI)</i><br><i>Reverse 5' GGCG <b>CTCGAG</b> TTATTGTTTGGAAACCTC 3' (XhoI)</i>       |
| LipL41 | <i>Forward 5' GCG <b>GAATTC</b> GCAGCTACAGTCGATGTAGAA 3' (EcoRI)</i><br><i>Reverse 5' CGCG <b>CTCGAG</b> TTACTTTGCGTTGCTTTCATC 3' (XhoI)</i> |
| LipL46 | <i>Forward 5' ATT <b>GAGCTC</b> GGTTCTTCCGGTTCCACT 3' (SacI)</i><br><i>Reverse 5' CGGC <b>GTCGAC</b> TTATTTCAAAGGTTTGAA 3' (SalI)</i>        |
| OmpL1  | <i>Forward 5' GCCG <b>GAATTC</b> ATCACCAAAGATGGTTTA 3' (EcoRI)</i><br><i>Reverse 5' CGCG <b>CTCGAG</b> TTAGAGTTCGTGTTTATA 3' (XhoI)</i>      |
| OmpL37 | <i>Forward 5' CTG <b>GAATTC</b> GTTTCGCCGGATCAGATC 3' (EcoRI)</i><br><i>Reverse 5' GCGCC <b>CTCGAG</b> TTAATTTTGTGTTTTTGT 3' (XhoI)</i>      |
